# Supplementary material
Source: PubMed Central journal article supplement (PMC7759004)
Supplement: tx0c00247_si_001.pdf [file tx0c00247_si_001.pdf]

# Flavor-Toxicant Correlation in E-cigarettes: A Meta-Analysis

*Sally Salam, BS, † Najat Aoun Saliba, PhD, †, § Alan Shihadeh, ScD, ‡, § Thomas Eissenberg, †, § and Ahmad El-Hellani, PhD †, §, \**

† Department of Chemistry, Faculty of Arts and Sciences, American University of Beirut, Beirut, Lebanon

‡ Department of Mechanical Engineering, Maroun Semaan Faculty of Engineering and Architecture, American University of Beirut, Beirut, Lebanon

† Department of Psychology, Virginia Commonwealth University, Richmond, Virginia, USA

§ Center for the Study of Tobacco Products, Virginia Commonwealth University, Richmond, Virginia, USA

**Table S1.** A List of chemical compounds identified in the meta-analysis with structural information.

| Chemical                          | FG*1      | FG2      | FG3      | FG4 |
|-----------------------------------|-----------|----------|----------|-----|
| 1,4-Cineole                       | Ether     |          |          |     |
| 1-Amyl alcohol                    | Alcohol   |          |          |     |
| 1-Ethenyloxy pentane              | Alkene    | Ether    |          |     |
| 1-Pentanol                        | Alcohol   |          |          |     |
| 2,3,5,6-Tetramethylpyrazine       | Pyrazine  |          |          |     |
| 2,3,5-Trimethylpyrazine           | Pyrazine  |          |          |     |
| 2,3-Butanedione                   | Diketone  |          |          |     |
| 2,3-Pentanedione                  | Diketone  |          |          |     |
| 2,5-Dimethylpyrazine              | Pyrazine  |          |          |     |
| 2,6-Dimethyl-1,8-naphthyridine    | Pyridine  |          |          |     |
| 2,6-Dimethyl-4-propyl pyridine    | Pyridine  |          |          |     |
| 2,6-Dimethylpyridine              | Pyridine  |          |          |     |
| 2-Acetylpyridine                  | Ketone    | Pyridine |          |     |
| 2-Ethoxy-1-(3' pyridyl) ethylene  | Alkene    | Ether    | Pyridine |     |
| 2-Isopropyl-4-methylthiazole      | Thiazole  |          |          |     |
| 2-Isopropyl-5-methylhex-2-enal    | Aldehyde  | Alkene   |          |     |
| 2-Methoxy-4-propylphenol          | Ether     | Phenol   |          |     |
| 2-Methylbutyl acetate             | Ester     |          |          |     |
| 2-Methylbutyrate                  | Ester     |          |          |     |
| 2-Methylpyrazine                  | Pyrazine  |          |          |     |
| 3-Methyl-1-phenyl-1H-pyrazole     | Aryl      | Pyrazole |          |     |
| 3-Methylcoumarin                  | Alkene    | Aryl     | Ester    |     |
| 3-Methylcyclopentane-1,2-dione    | Diketone  |          |          |     |
| 4-(4-Hydroxyphenyl)butan-2-one    | Ketone    | Phenol   |          |     |
| 4,4-Dimethyloxolan-2-one          | Lactone   |          |          |     |
| 4-Methoxy benzaldehyde            | Aldehyde  | Aryl     | Ether    |     |
| 4-Methylacetophenone              | Aryl      | Ketone   |          |     |
| 5-Methylfurfural                  | Aldehyde  | Furan    |          |     |
| 6-Methyl-5-hepten-2-one           | Alkene    | Ketone   |          |     |
| 6-Methylcoumarin                  | Alkene    | Aryl     | Ester    |     |
| 7-Methylcoumarin                  | Alkene    | Aryl     | Ester    |     |
| Acetaldehyde hexamethylenediazone | Hydrazone |          |          |     |
| Acetoin                           | Alcohol   | Ketone   |          |     |
| Acetophenone                      | Aryl      | Ketone   |          |     |
| Acetylpyrazine                    | Ketone    | Pyrazine |          |     |
| Acetylpyrrole                     | Ketone    | Pyrrole  |          |     |
| Allyl cyclohexanepropionate       | Alkene    | Ester    |          |     |
| Allyl hexanoate                   | Alkene    | Ester    |          |     |
| Amyl acetate                      | Ester     |          |          |     |

|                                              |                 |           |         |
|----------------------------------------------|-----------------|-----------|---------|
| Amyl butyrate                                | Ester           |           |         |
| Anethole                                     | Alkene          | Aryl      | Ether   |
| Anisyl acetate                               | Aryl            | Ester     | Ether   |
| Benzaldehyde                                 | Aldehyde        | Aryl      |         |
| Benzyl acetate                               | Aryl            | Ester     |         |
| Benzyl Alcohol                               | Alcohol         | Aryl      |         |
| Benzyl Benzoate                              | Aryl            | Ester     |         |
| Benzyl butyrate                              | Aryl            | Ester     |         |
| Benzyl cinnamate                             | Alkene          | Aryl      | Ester   |
| Benzyl propanoate                            | Aryl            | Ester     |         |
| Butyl butyrate                               | Ester           |           |         |
| Butyl butyrolactate                          | Ester           |           |         |
| Caffeine                                     | Pyrimidinedione | Imidazole |         |
| Camfor                                       | Ketone          |           |         |
| Carvone                                      | Ketone          | Alkene    |         |
| Cinnamaldehyde                               | Aldehyde        | Alkene    | Aryl    |
| Cinnamyl alcohol                             | Alcohol         | Alkene    | Aryl    |
| Cinnamyl isovalerate                         | Alkene          | Aryl      | Ester   |
| Cis-3-Hexenal                                | Aldehyde        | Alkene    |         |
| Cis-3-Hexenol                                | Alcohol         | Alkene    |         |
| Cis-3-Hexenylacetate                         | Alkene          | Ester     |         |
| Cis-3-Hexenylvalerate                        | Alkene          | Ester     |         |
| Cis-Limonene oxide                           | Alkene          | Epoxide   |         |
| Citral                                       | Aldehyde        | Alkene    |         |
| Citronellol                                  | Alcohol         | Alkene    |         |
| Cocal                                        | Aldehyde        | Alkene    | Aryl    |
| Corylone                                     | Diketone        |           |         |
| Coumarin                                     | Alkene          | Aryl      | Lactone |
| Decanal                                      | Aldehyde        |           |         |
| Diethyl succinate                            | Ester           |           |         |
| Estragole                                    | Alkene          | Aryl      | Ether   |
| Ethanol                                      | Alcohol         |           |         |
| Ethyl 2-methyl butanoate                     | Ester           |           |         |
| Ethyl 3-methyl-3-phenyloxirane-2-carboxylate | Aryl            | Epoxide   | Ester   |
| Ethyl acetate                                | Ester           |           |         |
| Ethyl acetoacetate                           | Ester           | Ketone    |         |
| Ethyl anthranilate                           | Aryl            | Ester     | Amine   |
| Ethyl butanoate                              | Ester           |           |         |
| Ethyl caproate                               | Ester           |           |         |
| Ethyl caprylate                              | Ester           |           |         |
| Ethyl cinnamate                              | Alkene          | Aryl      | Ester   |
| Ethyl heptanoate                             | Ester           |           |         |
| Ethyl hexanoate                              | Ester           |           |         |

|                                  |          |         |        |        |
|----------------------------------|----------|---------|--------|--------|
| Ethyl isovalerate                | Ester    |         |        |        |
| Ethyl lactate                    | Alcohol  | Ester   |        |        |
| Ethyl maltol                     | Alcohol  | Alkene  | Ether  | Ketone |
| Ethyl phenylacetate              | Aryl     | Ester   |        |        |
| Ethyl propanoate                 | Ester    |         |        |        |
| Ethyl Salicylate                 | Ester    | Phenol  |        |        |
| Ethyl vanillin                   | Aldehyde | Ether   | Phenol |        |
| Ethyl-methyl-hydroxymethyl amine | Alcohol  | Amine   |        |        |
| Eucalyptol                       | Ether    |         |        |        |
| Eugenol                          | Alkene   | Ether   | Phenol |        |
| Fenchol                          | Alcohol  |         |        |        |
| Furaneol                         | Alcohol  | Alkene  | Ether  | Ketone |
| Furfural                         | Aldehyde | Furan   |        |        |
| Furfuryl alcohol                 | Alcohol  | Furan   |        |        |
| Geranyl propanoate               | Alkene   | Ester   |        |        |
| Guaiacol                         | Ether    | Phenol  |        |        |
| Hedione                          | Ester    | Ketone  |        |        |
| Heliotropine                     | Aldehyde | Aryl    | Ether  |        |
| Hemineurine                      | Thiazole | Alcohol |        |        |
| Hexanol                          | Alcohol  |         |        |        |
| Hexyl 2-methylbutyrate           | Ester    |         |        |        |
| Hexyl acetate                    | Ester    |         |        |        |
| Hexyl hexanoate                  | Ester    |         |        |        |
| Hydrocoumarin                    | Aryl     | Lactone |        |        |
| Hydroxyacetone                   | Alcohol  | Ketone  |        |        |
| hydroxydihydrocarvone            | Alcohol  | Alkene  | Ketone |        |
| Isoamyl butyrate                 | Ester    |         |        |        |
| Isoamyl isovalerate              | Ester    |         |        |        |
| Isoamyl phenylacetate            | Aryl     | Ester   |        |        |
| Isobutyl acetate                 | Ester    |         |        |        |
| Isopentyl acetate                | Ester    |         |        |        |
| Isopentyl alcohol                | Alcohol  |         |        |        |
| Isopulegol                       | Alcohol  | Alkene  |        |        |
| Isosafroeugenol                  | Alkene   | Ether   | Phenol |        |
| Limonene                         | Alkene   |         |        |        |
| Linalool                         | Alcohol  | Alkene  |        |        |
| Linalool oxide                   | Alcohol  | Alkene  | Ether  |        |
| Linalyl acetate                  | Alkene   | Ester   |        |        |
| L-menthyl acetate                | Ester    |         |        |        |
| Luminol                          | Aryl     | Amine   | Amide  |        |
| Maltol                           | Alcohol  | Alkene  | Ether  | Ketone |
| Melonal                          | Aldehyde | Alkene  |        |        |
| Menthol                          | Alcohol  |         |        |        |

|                                             |          |        |        |
|---------------------------------------------|----------|--------|--------|
| Menthone                                    | Ketone   |        |        |
| Methyl 3-hydroxyhexanoate                   | Alcohol  | Ester  |        |
| Methyl anthranilate                         | Aryl     | Ester  | Amine  |
| Methyl cinnamate                            | Alkene   | Aryl   | Ester  |
| Methyl cyclopentenolone                     | Alcohol  | Alkene | Ketone |
| Methyl heptenone                            | Alkene   | Ketone |        |
| Methyl salicylate                           | Ester    | Phenol |        |
| Neomenthol                                  | Alcohol  |        |        |
| Nerol                                       | Alcohol  | Alkene |        |
| Nerol acetate                               | Alkene   | Ester  |        |
| p-Anisaldehyde                              | Aldehyde | Aryl   | Ether  |
| p-Cymene                                    | Aryl     |        |        |
| Phenethyl alcohol                           | Alcohol  | Aryl   |        |
| Phenethyl isovalerate                       | Aryl     | Ester  |        |
| Piperitone                                  | Alkene   | Ketone |        |
| Piperonal                                   | Aldehyde | Aryl   | Ether  |
| p-Tolualdehyde                              | Aldehyde | Aryl   |        |
| Pulegone                                    | Alkene   | Ketone |        |
| Pyridine                                    | Pyridine |        |        |
| Styralyl acetate                            | Aryl     | Ester  |        |
| Tetrahydrolinalool                          | Alcohol  |        |        |
| Theaspirane                                 | Alkene   | Ether  |        |
| Thymol                                      | Phenol   |        |        |
| Trans-2-Hexenol                             | Alcohol  | Alkene |        |
| Triacetin                                   | Ester    |        |        |
| Vanillin                                    | Aldehyde | Ether  | Phenol |
| $\alpha,\alpha$ -Dimethylphenethyl butyrate | Aryl     | Ester  |        |
| $\alpha$ -Ionone                            | Alkene   | Ketone |        |
| $\alpha$ -Pinene                            | Alkene   |        |        |
| $\alpha$ -Terpineol                         | Alcohol  | Alkene |        |
| $\beta$ -Damascone                          | Alkene   | Ketone |        |
| $\beta$ -Ionone                             | Alkene   | Ketone |        |
| $\beta$ -Myrcene                            | Alkene   |        |        |
| $\beta$ -Pinene                             | Alkene   |        |        |
| $\gamma$ -Butyrolactone                     | Lactone  |        |        |
| $\gamma$ -Decalactone                       | Lactone  |        |        |
| $\gamma$ -Dodecalactone                     | Lactone  |        |        |
| $\gamma$ -Hexalactone                       | Lactone  |        |        |
| $\gamma$ -Ionone                            | Alkene   | Ketone |        |
| $\gamma$ -Nonalactone                       | Lactone  |        |        |
| $\gamma$ -Octalactone                       | Lactone  |        |        |
| $\gamma$ -Terpinene                         | Alkene   |        |        |
| $\gamma$ -Undecalactone                     | Lactone  |        |        |

|                            |         |
|----------------------------|---------|
| $\gamma$ -Valerolactone    | Lactone |
| $\delta$ -Decalactone      | Lactone |
| $\delta$ -Dodecalactone    | Lactone |
| $\delta$ -Tetradecalactone | Lactone |
| $\delta$ -undecalactone    | Lactone |

---

\* FG: functional group.
